## **Multi-environment phenotyping of *C. elegans* for robust evaluation of physical performance**

Jennifer E. Hewitt<sup>1,2</sup>, Ricardo Laranjeiro<sup>3</sup>, Masoud Norouzi<sup>1</sup>, Rebecca Ellwood<sup>4</sup>, Adam Antebi<sup>2</sup>,  
Nathaniel J. Szewczyk<sup>4</sup>, Monica Driscoll<sup>3</sup>, and Siva A. Vanapalli<sup>1</sup>

1. Department of Chemical Engineering, Texas Tech University, Lubbock, TX, USA
2. Department of Molecular Genetics of Ageing, Max Planck Institute for Biology of Ageing, and Cologne Excellence Cluster on Cellular Stress Responses in Aging-Associated Diseases (CECAD), University of Cologne, Cologne, Germany
3. Department of Molecular Biology and Biochemistry, Rutgers, The State University of New Jersey, Piscataway, NJ, USA
4. MRC/Arthritis Research UK Centre for Musculoskeletal Ageing Research, University of Nottingham, United Kingdom & National Institute for Health Research Nottingham Biomedical Research Centre, Derby, UK

## ABSTRACT

Determining the physical performance of humans using several measures is essential to evaluating the severity of diseases, understanding the role of environmental factors, and developing therapeutic interventions. Development of analogous measures of physical performance in model organisms can help in identifying conserved signaling pathways and prioritizing drug candidates. In this study, we propose a multi-environment phenotyping (MEP) approach that generates a comprehensive set of measures indicative of physical performance in *C. elegans*. We challenge *C. elegans* in different mechanical environments of burrowing, swimming, and crawling, each of which places different physiological demands on the animals to generate locomotory forces. Implementation of the MEP approach is done using three established assays corresponding to each environment—a hydrogel-based burrowing assay, the CeleST swim assay, and the NemaFlex crawling strength assay. Using this approach, we study individuals and show that these three assays report on unique aspects of nematode physiology, as phenotypic measures obtained from different environments do not correlate with one another. Analysis of a subset of genes representative of oxidative stress, glucose metabolism, and fat metabolism show differential expression depending on the animal's environment, suggesting that each environment evokes a response with distinct genetic requirements. To demonstrate the utility of the MEP platform, we evaluate the response of a muscular dystrophy model of *C. elegans dys-1* to drug interventions of prednisone, melatonin and serotonin. We find that prednisone, which is the current treatment standard for human Duchenne muscular dystrophy, confers benefits in all three assays. Furthermore, while the tested compounds improve the physical performance of *dys-1*, these compounds are not able to fully restore the measures to

wild-type levels, suggesting the need for discovery efforts to identify more efficacious compounds that could be aided using the MEP platform. In summary, the MEP platform's ability to robustly define *C. elegans* locomotory phenotypes demonstrates the utility of the MEP approach toward identification of candidates for therapeutic intervention, especially in disease models in which the neuromuscular performance is impaired.

## 1 INTRODUCTION

2 Physical performance or fitness in humans is formally assessed using health-related or  
3 skill-related measures [1]. Health-related measures include cardiorespiratory endurance, muscle  
4 endurance, muscle strength, body composition, and flexibility. Skill-related measures include  
5 agility, balance, coordination, power, speed and reaction time. Assessment of human physical  
6 performance utilizing such measures is central to evaluating severity of diseases, especially  
7 diseases in which the neuromuscular system is involved [2-4]. Likewise, declines in physical  
8 performance have been shown to correlate with the risk of disability, hospitalization rates, and  
9 mortality in the elderly [5-8].

10 Linking the molecular, cellular, and tissue-level mechanisms to human physical performance is  
11 best achieved in model organisms as they allow identification of conserved signaling pathways  
12 and therapeutic interventions. The nematode *Caenorhabditis elegans* is a popular model  
13 organism that features relatively simple and well-understood biology, rapid lifecycle, and ease of  
14 culture [9]. Importantly, genetic conservation supports the relevance of the *C. elegans* model for  
15 studying gene activities and pathways relevant to a variety of human diseases [10-16] including  
16 Duchenne muscular dystrophy [17], neurodegenerative diseases [18-20], and sarcopenia [21].  
17 Moreover, *C. elegans* has a conserved muscular architecture comprising contractile elements and  
18 attachments similar to higher animals. Thus, development of approaches to assess the physical  
19 performance of *C. elegans* using measures that are analogous to human measures may help in  
20 translating discoveries made in *C. elegans* to human health.

21 Assessment of physical performance in the nematode *C. elegans* usually involves monitoring the  
22 locomotion of crawling *C. elegans* on agar plates or thrashing in liquid [22, 23], although more  
23 recently, assays have also been developed to characterize the burrowing ability of *C. elegans* [24,  
24 25]. Technical advances in computer vision and data-driven approaches have led to increasing  
25 the depth of phenotypic information from crawling and swim assays by generating  
26 multidimensional readouts [26, 27]. Despite these significant advances, current approaches to  
27 characterize *C. elegans* physical performance commonly rely on investigating animal  
28 locomotory response in a singular mechanical environment, limiting the extent of physiological  
29 and clinically relevant measures that can be obtained.

30 Depending on the mechanical resistance of the environment, *C. elegans* can adjust its gait and  
31 body mechanics [28]. On agar plates, the surface tension of the thin liquid layer at the agar  
32 surface constrains the animal motion to two dimensions and also aids in propulsive thrust [29]. In  
33 liquid, the nematode body experiences rotational slip and therefore to effectively swim, the  
34 internal forces generated within the animal need to balance the external hydrodynamic forces  
35 [30]. In gel environments, the animal burrows by executing three-dimensional maneuvers,  
36 making the neuromuscular actuation different from that on two-dimensional substrates [30, 31].  
37 Finally, studies have shown that in microfluidic pillar environments, animals can adjust body  
38 gait, speed, and force generation depending on the geometry and mechanical resistance of the  
39 pillar arena [32-34]. Thus, opportunities exist to expose *C. elegans* to different mechanical  
40 environments and extract information analogous to human health-related or skill-related  
41 measures.

42 In this study, we establish a multi-environment phenotyping (MEP) platform that evaluates the  
43 physical performance of *C. elegans* in three distinct mechanical environments. Our approach  
44 combines three assays of physical performance — NemaFlex [34], CeleST [35], and a hydrogel-  
45 based burrowing assay [25] — to assess animal physical capacities in environments that elicit  
46 locomotory modes of crawling, swimming, and burrowing, respectively. By assaying the same  
47 individual animal in each environment, we show that each assay provides distinct information on  
48 animal capabilities, and that crawling, swimming, and burrowing evoke distinct responses  
49 associated with changes in expression of different genes. To demonstrate the applicability of the  
50 MEP platform for evaluating *C. elegans* disease models and therapeutic interventions, we assess  
51 the physiological health of *dys-1* mutants, the *C. elegans* model for Duchenne muscular  
52 dystrophy. We show that while the tested compounds improve *dys-1* health, the treatments are  
53 not able to fully restore wild-type behaviors, underscoring the need for further discovery efforts  
54 for compounds that counter defects in all the measures reported in the MEP platform.

55

## 56 **RESULTS**

### 57 **Overview of the multi-environment phenotyping approach**

58 The multi-environment phenotyping (MEP) platform consists of three assays conducted in  
59 different mechanical environments that evoke one of three forms of locomotion from *C. elegans*:  
60 burrowing, swimming, or crawling. We extracted descriptive measures from each of the three  
61 environments (Figure 1).

62 In the hydrogel burrowing assay [25] we load animals into the base of a well and add a layer of  
63 Pluronic F-127 solution, which is a transparent and biocompatible hydrogel that transitions from  
64 liquid to solid under temperature upshifts. Pluronic solution is maintained at 14°C before transfer  
65 to the well plate, which allows the solution to stay liquid until it equilibrates to room temperature  
66 and gels to trap the nematodes. A chemoattractant is then added to the surface, encouraging the  
67 animals to burrow to the surface of the gel. Individuals can be scored based on the time they take  
68 to burrow to the surface, while with populations, the number of animals reaching the surface is  
69 counted at regular time intervals.

70 The second physical environment we tested is liquid, in which swim motion is assayed using the  
71 *C. elegans* Swim Test (CeleST), analyzed with software that evaluates 8 measures related to  
72 body morphology and activity [35, 36]. The four morphological measures include (i) body wave  
73 number – a measure of waviness of the body posture, (ii) asymmetry – the degree to which the  
74 animal bends more toward one side or the other, (iii) stretch – a measure of how deep or flat the  
75 body bends are, and (iv) curling – percentage of time that an animal spends overlapping with  
76 itself. The four activity-related measures include (i) wave initiation rate – the number of body  
77 waves initiated by the head or tail per minute, (ii) travel speed – the distance travelled during a  
78 defined time, (iii) brush stroke – area painted by the animal body in a complete stroke, and (iv)  
79 swim activity index – brush stroke normalized by the time taken to perform two strokes.

80 The third environment features pillars that are deformed while the animal crawls in a  
81 microfluidic chamber, enabling calculation of muscle forces [34]. This NemaFlex assay involves

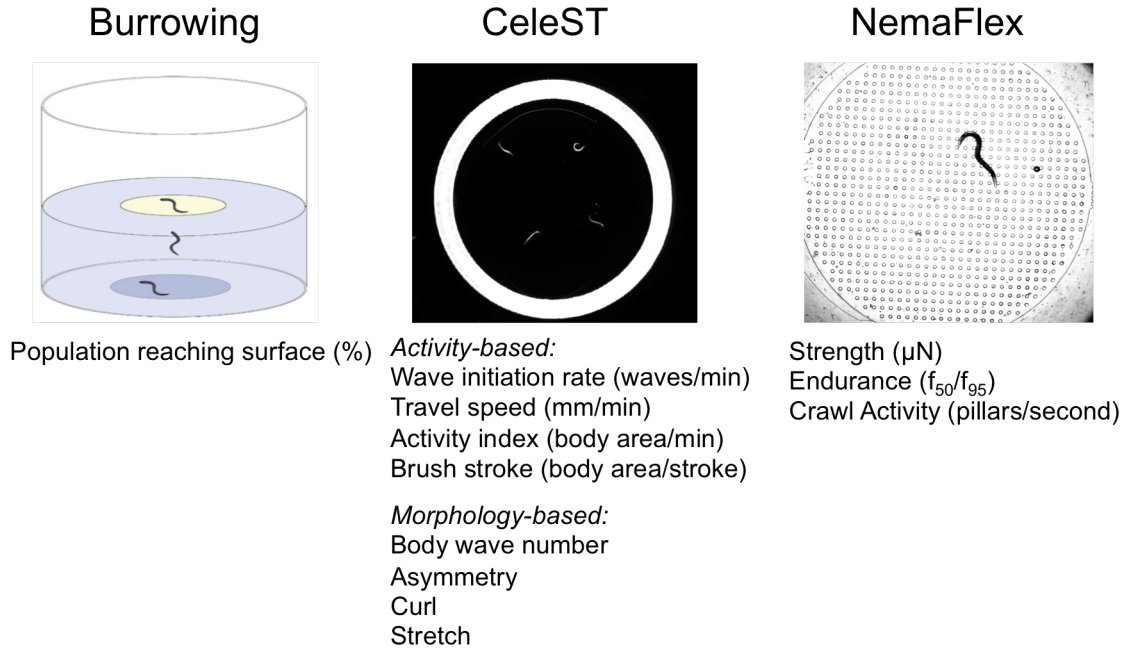

Fig. 1. Overview of the multi-environment phenotyping (MEP) platform for evaluation of the physical performance of *C. elegans*. The MEP platform consists of a hydrogel-based burrowing assay, the CeleST swim assay, and the NemaFlex assay. From these three platforms, animal populations are assessed for their capacity to burrow in 3D, swim, and crawl, respectively. A total of twelve different measures are extracted from the three distinct mechanical environments.

82  
83 imaging in a microfluidic device in which the nematode adopts a crawling gait due to the  
84 presence of a resistive array of flexible micropillars [34, 37]. From these images, pillars with  
85 maximum deflections are extracted, and these deflections are translated to maximal forces.  
86 Muscle strength is defined as the 95<sup>th</sup> percentile of the maximal forces or  $f_{95}$ . In addition to  
87 measuring the muscle strength from the NemaFlex assay, we also extract measures of muscular  
88 endurance and crawling activity. We define muscular endurance as the ratio  $f_{50}/f_{95}$ , where  $f_{50}$   
89 represents 50<sup>th</sup> percentile of the maximal forces. Animals that exert a high force as a one-time  
90 event would have a low ratio while those exerting large forces continuously would have a high  
91 ratio. Thus, the ratio  $f_{50}/f_{95}$  is taken as a measure of muscular endurance. The crawling activity is  
92 calculated from the number of microfluidic pillars that the animal interacts with per unit time.



93

94 **An individual's physical performance is distinct in different mechanical environments**

95

96 Given that the burrowing, CeleST, and NemaFlex assays expose *C. elegans* to different  
97 mechanical environments, we wondered whether an individual that performs well in one  
98 environment would also perform better in a different environment. For example, if an animal  
99 shows good swim performance based on CeleST measures, the question is whether the same  
100 individual would show improved muscle strength as reported by the NemaFlex assay. Likewise,  
101 if an animal is efficient at burrowing and reaching the gel surface quickly, will this individual  
102 also display better swim performance? In addition, we sought to determine whether measures of  
103 physical performance obtained from different environments correlated with one another.

104 To address how different the physical performance of an individual is in each of our distinct  
105 mechanical environments, we phenotyped the same animal using burrowing, CeleST, and  
106 NemaFlex assays. We loaded wild-type animals into well plates with the pluronic gel, allowed  
107 them to burrow toward the surface, and measured the burrowing time for each individual. As  
108 each animal reached the gel surface, we immediately transferred it to a seeded NGM plate. The  
109 individuals were allowed to recover for 4 hours to allay any potential burrowing fatigue. We then  
110 transferred each individual into a liquid drop briefly for the CeleST assay while maintaining the  
111 identity of each animal from the burrowing assay. Finally, each of the indexed individuals was  
112 loaded into the NemaFlex device chambers for characterization of crawling and strength  
113 measures.

114 To assess inter- and intra-environment dependence, we determined the Pearson correlation  
115 coefficients for each combination of score metrics (Figure 2A). The correlation values between  
116 all variables are represented as the intensity value of the heat map. We find some strong  
117 correlations among the CeleST measures extracted from the swimming environment.  
118 Morphology-related measures of body wave number, asymmetry, and stretch all positively  
119 correlate with one another, while activity-based measures of wave initiation rate, travel speed,  
120 brush stroke, and swim activity also positively correlate with one another. Variables between the  
121 two morphology- and activity-related categories are negatively correlated with one another.  
122 Since it has previously been reported that the values of the morphological measures tend to  
123 increase with age and the activity-based measures tend to decrease in value with age [35],  
124 wild-type aging is at least one context in which these measures are correlated in a similar manner  
125 at a population level. Crawling-associated measures within the NemaFlex environment correlate  
126 weakly with one another.

127 Importantly, measures from different environments have correlation coefficients hovering around  
128 zero—indicating the different environments in fact reveal different and non-overlapping  
129 capabilities. Furthermore, principal component analysis (PCA) based on the correlation matrix of  
130 all variables shows that each principal component can explain only a small amount of the  
131 variance, with the first component accounting for less than 30% of the variance (Figure 2B). In  
132 fact, seven components are required to explain at least 80% of the variance of the dataset,  
133 indicating that no useful reduction of the dimensionality of the dataset is obtained via a PCA.  
134 Our data support the idea that the various measures reported from each of the environments  
135 reflect distinct indicators of an animal’s physiological health. The results also show that an

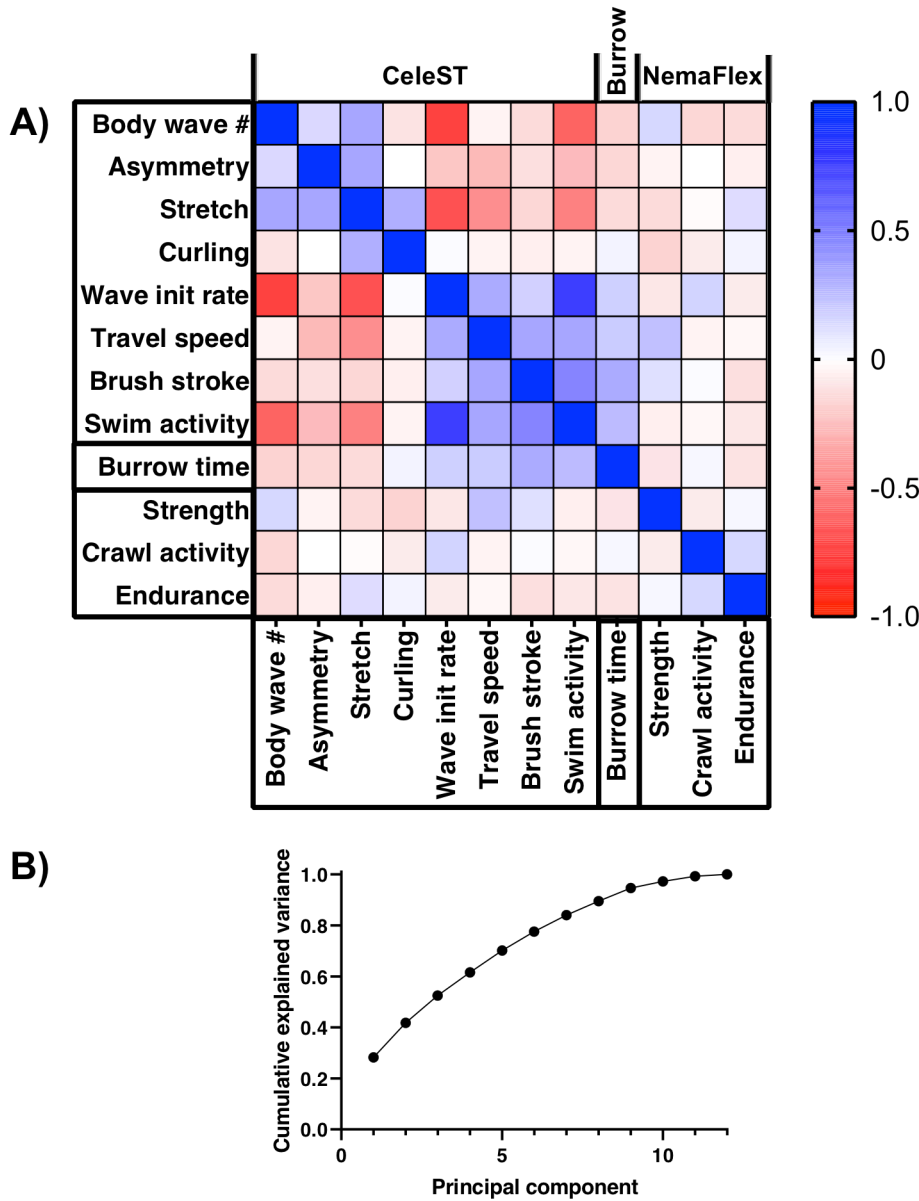

Fig. 2. Measures extracted from the mechanically distinct swimming, crawling, and burrowing environments are not strongly correlated with one another. (A) A heat map shows the correlations among the different parameters extracted from the three different environments used to phenotype the same individual animals. Among all measures, strong correlations exist between only subsets of the CeleST swim measures, and not between the swimming, crawling, and burrowing measures. Intensity values in the heat map show the correlation coefficient obtained from a linear fit of the individual data for each variable plotted against one another. N=56 individual animals tested in all three environments. (B) A principle components analysis based on the correlation matrix does not reduce the dimensionality of the data, as seven components are necessary to explain 80% of the variation. This means that the data do not form any meaningful smaller sub-dimension in the original 12-dimensional space and therefore report primarily on distinct rather than inter-dependent measures.

137 individual performing better in one environment may not perform well in a different  
138 environment, suggesting that the MEP platform can comprehensively inform on *C. elegans*  
139 physiology.

140 **Crawling, swimming, and burrowing environments each elicit a unique transcriptional**  
141 **response**

142 Our observations prompted us to ask whether animals exposed to each environment show  
143 differences at the gene expression level. We previously reported that placing *C. elegans* in a  
144 swimming environment as compared to a crawling environment elicits a specific gene expression  
145 response across a number of different functional clusters of genes, including those affecting  
146 oxidative stress response, glucose metabolism, and fat metabolism [38]. Documenting different  
147 transcriptional signatures in swimming versus crawling environments would support the value of  
148 assaying animals in different environments, as this multi-behavioral test might expose defects or  
149 improvements apparent in only a subset of environments.

150 To test for transcriptional profile intersections, we extended our qPCR data that compared  
151 changes in gene expression after 90 minutes of swimming to those in a control group of crawling  
152 worms [38] by evaluating selected expression in animals after 90 minutes of burrowing relative  
153 to a crawling control. Data for both swimming and burrowing animals are shown as the log<sub>2</sub> fold  
154 change relative to a crawling group that was left on unseeded NGM plates during the 90-minute  
155 swim or burrowing period (Figure 3).

156 First, in animals that had burrowed for 90 minutes, we assessed five of the previously reported  
157 oxidative stress response genes that respond to swimming (*sod-3*, *sod-5*, *ctl-2*, *gst-4*, and

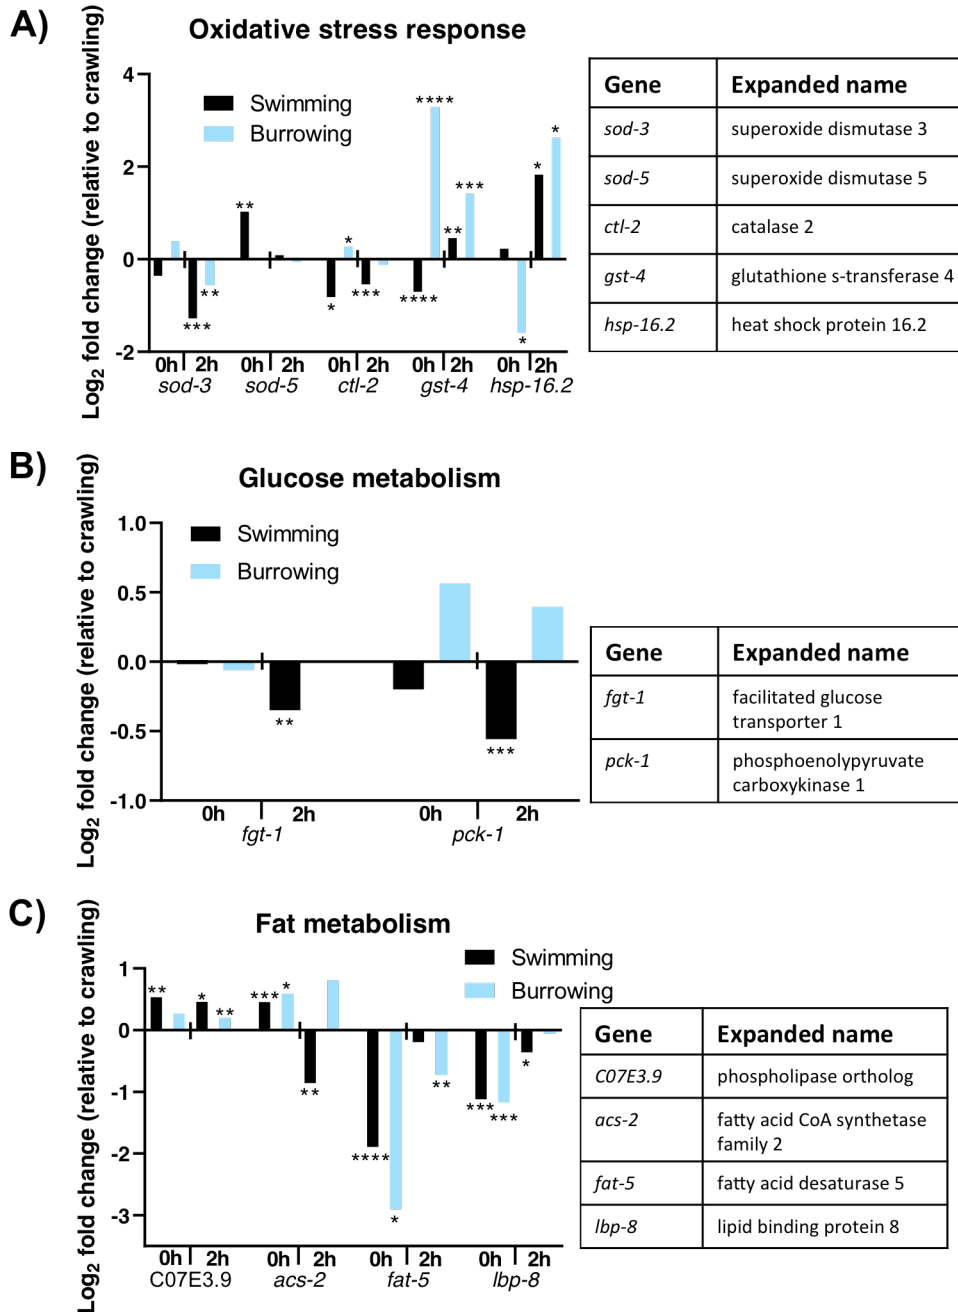

Fig. 3. Swimming, burrowing, and crawling each elicit different gene expression responses. Animals that swim or burrow for 90 minutes differentially express genes involved in (A) oxidative stress response, (B) glucose metabolism, and (C) fat metabolism. Changes in expression are compared to a control group of animals that crawled on unseeded NGM plates for the 90-minute period. 0h is immediately after the 90-minute period; 2h is 2 hours after cessation of the activity trial period. With the permission of the authors, gene expression data from animals after 90 minutes of swimming is reanalyzed from published data in Ref. 38. For each of burrowing and crawling control populations, ~30 animals were collected, and experiments were done in triplicate. Significance was assessed with a 2-sample t-test. \*,  $P \leq 0.05$ ; \*\*,  $P \leq 0.01$ ; \*\*\*,  $P \leq 0.001$ ; \*\*\*\*,  $P \leq 0.0001$ .

159 *hsp-16.2*) (Figure 3A). Immediately after the burrowing or swimming at the 0h time point, there  
160 were some notable differences between the swimming and burrowing animals. While the  
161 superoxide dismutase 3 (*sod-3*) gene was not differentially regulated in burrowing vs. swimming  
162 animals, *sod-5* was significantly upregulated in animals that swam but was not changed in  
163 animals that burrowed. Catalase (*ctl-2*) and *gst-4* were significantly upregulated in burrowing  
164 animals but downregulated in swimming animals, while *hsp-16.2* was not changed in animals  
165 that swam but was largely downregulated in animals that burrowed. These results indicate that  
166 burrowing animals have an immediate transcriptional oxidative stress response distinct from that  
167 of crawling or swimming animals.

168 At the 2-hour time point, oxidative stress-related expression was fairly similar between animals  
169 that swam or burrowed. The time point 2 hours after challenge cessation may begin to reflect  
170 longer term adaptive changes. Notably, 2 hours after swim cessation, animals that swam  
171 downregulated the expression of glucose metabolism genes *fgt-1* and *pck-1*, which are involved  
172 in glucose transport and gluconeogenesis, respectively. Neither *fgt-1* nor *pck-1* was  
173 downregulated by burrowing (Figure 3B). Finally, the fat metabolism genes assessed here  
174 (*C07E3.9*, *acs-2*, *fat-5*, and *lbp-8*) showed a similar overall pattern in expression changes  
175 between burrowing and swimming animals; however, swimming and burrowing animals showed  
176 remarkably different expression patterns than their crawling counterparts (Figure 3C).

177 Taken together, analysis of a subset of genes with roles in the oxidative stress response, glucose  
178 metabolism, and fat metabolism supports the idea that the environments/experiences of  
179 burrowing, swimming, and crawling place distinct demands on animal physiology. This analysis,  
180 along with the individual-level physical performance phenotyping data from Figure 2, supports

181 potential utilization of MEP to more comprehensively assess an animal's physiological health.

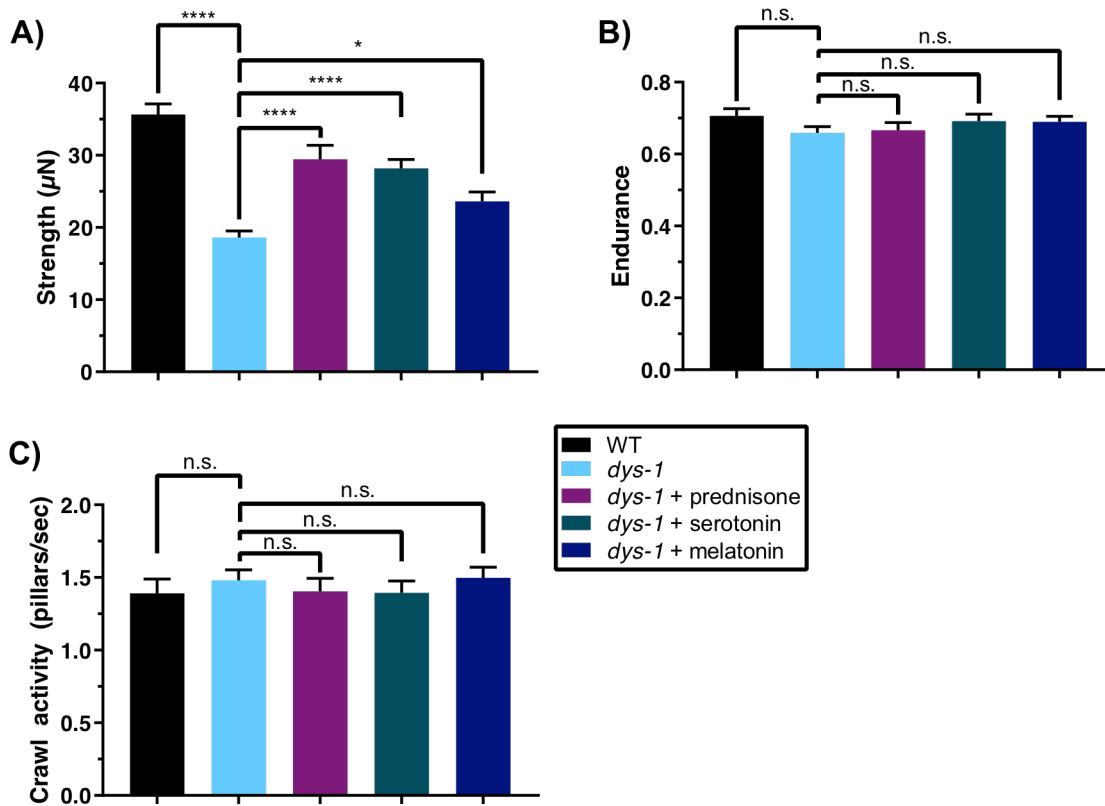

Fig. 4. NemaFlex crawling environment: dystrophin mutants are deficient in their strength, which is improved by prednisone, serotonin, and melatonin. (A) We measured strength of animals crawling in a pillar matrix push against pillars in the NemaFlex microfluidics device. *dys-1(eg33)* mutants are deficient in their strength compared to wild-type animals. All three compounds tested improve animal strength, with prednisone yielding the largest improvement. (B) Endurance of *dys-1(eg33)* mutants is not significantly different from that of wild type and also remains unaffected under treatments. (C) The crawling activity, which is defined as the number of pillars interacted with per second, of *dys-1(eg33)* is also not different from wild type and does not change under any treatments. WT: N=28; *dys-1*: N=37; *dys-1*+prednisone: N=33; *dys-1*+serotonin: N=35; *dys-1*+melatonin: N=37. Significance between WT and *dys-1* controls was assessed with a 2-sample t-test; significance between *dys-1* and *dys-1*+treatments was assessed with one-way ANOVA with Dunnett's post-hoc test. n.s., not significant; \*,  $P \leq 0.05$ ; \*\*\*\*,  $P \leq 0.0001$ .

182

### 183 Application of MEP platform to *dys-1* mutants and their response to drug interventions

184 We have shown that the MEP platform is suitable for assessing the physical performance of

185 *C. elegans* by exposing the animals to different mechanical environments. To demonstrate the

186 utility of our approach, we utilized the MEP framework to assess a *C. elegans* disease model for  
187 Duchenne muscular dystrophy (DMD), in which the nematode physical performance is greatly  
188 impaired and this decline in physical performance is of clinical relevance. For this purpose, we  
189 chose *dys-1(eg33)* mutants that are defective in the *C. elegans* dystrophin gene. We were also  
190 curious to know which of the measures of physical performance would be improved when *dys-1*  
191 animals were treated with drugs that have been previously tested in worm and mouse models of  
192 DMD. We chose prednisone and melatonin as drug interventions since prednisone is the standard  
193 of care for DMD in humans [39], and melatonin has been tested in humans with some beneficial  
194 effects on disease pathology [40]. We also included serotonin, as serotonin was shown to be  
195 capable of preventing muscle damage in a *C. elegans* DMD model [41], although serotonin alone  
196 was not found efficacious in a follow-up study in a mouse DMD model [42].

197 **Crawling environment in NemaFlex devices.** Using NemaFlex, we previously reported that  
198 *dys-1(eg33)* mutants are significantly weaker than their wild-type counterparts on the third day  
199 of adulthood [37]. Here, using a microfluidic device optimized for younger adult animals, we  
200 show that *dys-1* mutants are significantly weaker than wild-type animals on the second day of  
201 adulthood (Figure 4A). The ability to detect this weakness at an early time point is relevant in  
202 that patients with DMD exhibit muscle weakness early in life and intervention testing in the  
203 worm model can now be focused on earlier outcomes.

204 With an interest in measuring the efficacy of clinical interventions aimed at alleviating the *dys-1*  
205 pathophysiology, we found that treating *dys-1* mutants with prednisone and melatonin induces  
206 significant improvements in muscle strength over the control (Figure 4A). Serotonin, which was  
207 previously reported to reduce the number of damaged muscle cells in the sensitized *dys-1;hlh-1*



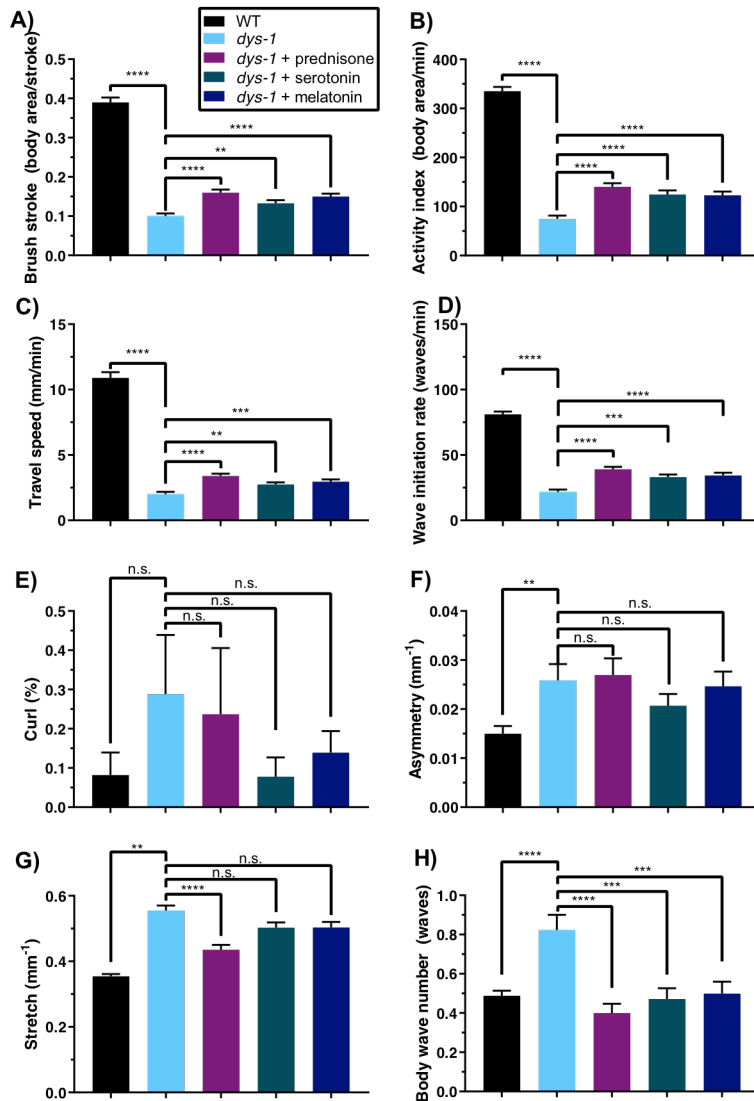

Fig. 5. Swimming environment: *dys-1(eg33)* mutants are deficient in nearly all swimming measures, and treatments with prednisone, serotonin, and melatonin improve most measures. *dys-1(eg33)* mutants have significantly lower (A) brush stroke, (B) activity index, (C) travel speed, and (D) wave initiation rate compared to wild type. Treatments with prednisone, serotonin, and melatonin give significant improvements in these measures. (E) *dys-1(eg33)* mutants are not significantly different from wild type in their curling percentage, but their (F) asymmetry, (G) stretch, and (H) body wave number are significantly higher than those of wild type, and all compounds improve these measures, with the exception of asymmetry, which is not improved under any treatment, and stretch, which is improved only by prednisone. All four of these measures, which reflect body posture, increase with age in wild-type animals. WT: N=56; *dys-1*: N=56; *dys-1*+prednisone: N=55; *dys-1*+serotonin: N=54; *dys-1*+melatonin: N=56. Significance between WT and *dys-1* controls was assessed with a 2-sample t-test; significance between *dys-1* and *dys-1*+treatments was assessed with one-way ANOVA with Dunnett's post-hoc test. n.s., not significant; \*\*,  $P \leq 0.01$ ; \*\*\*,  $P \leq 0.001$ ; \*\*\*\*,  $P \leq 0.0001$ .

209 model [41], also improves muscle strength of the *dys-1* mutant. While all three compounds  
210 improve strength of the *dys-1* mutant, none are able to restore strength back to wild-type levels in  
211 the strength assay, indicating these treatments do not fully reverse the muscular defects of the  
212 *dys-1* mutant. In addition, we find that measures of muscle endurance and crawling activity are  
213 not significantly different in the *dys-1* mutant and also do not change under treatment with any of  
214 the compounds (Figure 4B-C). Thus, treatments that confer positive effects in humans also  
215 confer positive effects in *C. elegans*, but differences are not revealed in all the measures from  
216 NemaFlex assay.

217 **CeleST swimming environment.** *dys-1* mutants are deficient in their thrash rate in liquid, a  
218 single-parameter readout of swimming ability [37]. We were therefore interested in assessing  
219 whether the various activity- and morphology-related measures of CeleST were also deficient in  
220 swimming *dys-1* animals. We found a striking difference between *dys-1* mutants and wild-type  
221 animals in all four activity-related measures, such that brush stroke, activity index, travel speed,  
222 and wave initiation rate are each a small fraction of baseline values for *dys-1* as compared with  
223 control animals (Figure 5A-D). Prednisone, serotonin, and melatonin, each of which improves  
224 muscle strength of *dys-1* mutants, also confer modest but significant improvements in each of  
225 these four activity-related swim measures. Additionally, while *dys-1* mutants do not appear to  
226 spend more time in a curled morphology compared with wild-type animals (Figure 5E), they do  
227 have significantly higher asymmetry, stretch, and body wave number (Figure 5F-H). Prednisone,  
228 serotonin, and melatonin are able to restore body wave number closer to wild-type levels but  
229 have no significant effect on the abnormally high asymmetry of *dys-1* animals. Only prednisone  
230 is able to restore abnormally high stretch closer to wild-type levels; serotonin and melatonin have

231 no significant effect. These results in the swim environment partially mirror the result of  
232 pharmacological treatments in improving strength: although the compounds do have  
233 advantageous effects on deficiencies, treated *dys-1* animals still trail behind wild-type animals.  
234 Furthermore, the resistance of animal asymmetry to the various treatments and the resistance of  
235 stretch to two of the three treatments indicate that these compounds are not targeting all aspects  
236 of physiological abnormalities in the *dys-1* mutants.

237 **Burrowing environment.** *dys-1(eg33)* mutants exhibit burrowing defects [31, 43], which we  
238 sought to confirm using our novel hydrogel-based burrowing platform. Here, we assessed the  
239 burrowing ability of *dys-1* animals that had been treated with pharmacological interventions,  
240 which is the first report of how pharmacological interventions impact burrowing ability in *C.*  
241 *elegans*. We find that while over 80% of wild-type animals reach the surface by the end of the  
242 2-hour burrowing assay, only about 5% of *dys-1* mutants reached the surface during this same  
243 time frame (Figure 6). The strong defect in *dys-1* burrowing ability suggests that burrowing may  
244 place a high demand on the muscle and requires intact excitation-contraction coupling in the  
245 muscle. These defects are only partially addressed by prednisone, melatonin, and serotonin, as  
246 each compound gives significant but modest improvements in the burrowing ability of *dys-1*,  
247 although treated animals still fall short of wild-type performance (Figure 6). Our data support the  
248 notion that the burrowing assay enhances the dynamic range in which we can evaluate drug  
249 interventions that counter *dys-1* deficits.

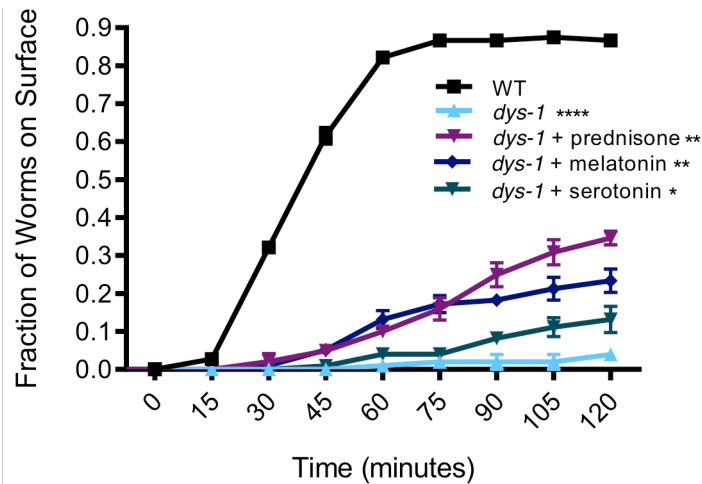

Fig. 6. Burrowing environment: dystrophin mutants are highly deficient in burrowing and some interventions modestly improve this deficiency. *dys-1(eg33)* mutants are highly deficient in burrowing, with only less than 10% of the population able to reach the surface compared to over ~80% of wild-type animals after a 2 hour trial. Prednisone, melatonin, and serotonin confer a significant improvement in the burrowing ability of *dys-1(eg33)* mutants, although their performance still falls short of that of wild type. Trials were in triplicate with average samples sizes of: WT: N=37; *dys-1*: N=34; *dys-1*+prednisone: N=34; *dys-1*+serotonin: N=33; *dys-1*+melatonin: N=33. Significance was assessed with two-way ANOVA. n.s., not significant; \*,  $P \leq 0.05$ ; \*\*,  $P \leq 0.01$ ; \*\*\*\*,  $P \leq 0.0001$ .

250

## 251 DISCUSSION

### 252 A novel multi-environment phenotyping platform

253 Assessment of physical performance in humans is not only central to a variety of disease

254 contexts but is also critical for evaluating the effects of factors such as aging, diet, and exercise.

255 Development of measures that are indicative of physical performance in *C. elegans* that are

256 analogous to human measures is expected to increase the translational relevance of this genetic

257 model. Behavioral assays that extract descriptive measures of *C. elegans* swim locomotion [26,

258 35, 36], crawling on NGM plates [22, 27, 44-46], and burrowing [24, 31] have been documented,

259 but none have investigated individuals in these different environments in the context of assessing

260 physical performance. We suggest that our approach that integrates multiple measures from three  
261 unique physical environments advances the general field of phenotyping in *C. elegans*.

262 In this study, we establish the value of this MEP platform by showing that the parameters  
263 reported are not redundant with one another—testing in multiple environments increases the  
264 “bandwidth” over which deficits can be detected and improvements can be documented. Our  
265 gene expression data show that swimming, crawling, and burrowing place unique demands on  
266 the nematode, as evidenced by analysis of a sample set of genes representative of oxidative stress  
267 response, glucose metabolism, and fat metabolism, which are differentially expressed depending  
268 on the animal’s environment and specific locomotory response. The environments of swimming,  
269 crawling, and burrowing can put different demands on the organism (e.g. oxygen, pressure, and  
270 physical forces) and its physiology (muscle demands and type of movement).

### 271 **Application of MEP to *C. elegans* DMD model**

272 Previous work reports studies of *dys-1* mutant deficits using single parameters such as crawling  
273 speeds [47], swimming speeds [48], burrowing ability [31], or muscle strength [37]. Additional  
274 work that did give multiple readouts of *dys-1* or *dys-1;hlh-1* animal physiology established  
275 baseline values for a few additional parameters within the swimming environment using the  
276 Biomechanical Profiling (BMP) platform but did not look at the effects of any interventions [26,  
277 49]. More recently, one study evaluated *dys-1* mutants in swimming, crawling, and burrowing  
278 environments and focused solely on the frequencies and amplitudes of the animal motion in the  
279 different environments [43].

280 Building on this prior work, we applied the MEP platform to test whether additional deficiencies  
281 could be detected in the same animal populations when multiple phenotypic measures were  
282 assayed. While crawling activity, muscular endurance, and curl percentage are not significantly  
283 different in *dys-1* mutants as compared with their wild-type counterparts, all other nine measures  
284 we report are strikingly worse. These nine measures span each of the three physical  
285 environments, indicating that we can detect deficiencies in the same animal population in all  
286 environments comprising the MEP platform. To establish the efficacy of the platform in  
287 detecting improvements from pharmacological interventions, we assessed animals that had been  
288 treated with prednisone and melatonin, previously reported to improve muscle strength [37], as  
289 well as serotonin, which had been previously reported to reduce the number of damaged muscle  
290 cells in the *dys-1;hlh-1* DMD model [41, 50].

291 The findings from our study here inform two potential directions in researching therapeutic  
292 compounds for DMD. First, any compounds that counter defects in all the measures reported in  
293 the MEP platform would be most promising to pursue in *mdx* mice and eventually clinical trials.  
294 Second, compounds that restore a subset of the deficiencies to wild-type levels may be worth  
295 pursuing and might be easily optimized in the facile *C. elegans* model. Similar to our study with  
296 the DMD model, future opportunities also exist to test other *C. elegans* disease models in which  
297 the neuromuscular system is impaired to potentially identify candidates for therapeutic  
298 intervention.

## 299 **CONCLUSIONS**

300 In this work, we have shown the power of a multi-environmental phenotyping platform that  
301 holds potential for improving translation of findings in *C. elegans* disease models to humans.  
302 The three different physical environments, which elicit distinct locomotory modes of crawling,  
303 swimming, and burrowing, each also challenge the animal in distinct manners, as demonstrated  
304 by the unique information extracted from each environment and the differences in expression of  
305 select genes in each environment. We demonstrated the utility of this framework by assessing the  
306 health of the *C. elegans* model for Duchenne muscular dystrophy, both with and without  
307 pharmacological interventions. The framework we describe here can be utilized in the future for  
308 robustly assessing health and determining interventions that might be most successfully  
309 translated from *C. elegans* disease models to mammalian systems.

310

## 311 **MATERIALS AND METHODS**

### 312 **Nematode strains, culture, and drug treatments**

313 Strains used in this experiment were wild-type (N2 strain) and *dys-1(eg33)* (BZ33 strain). The  
314 strains were provided by the *Caenorhabditis* Genetics Center (CGC). For all drug treatments,  
315 stock solutions were aliquoted on the surface of seeded NGM plates approximately 24 hours  
316 before using the plates. The final concentration of the drug was calculated based on the total  
317 volume of the contents of the plate. Concentrations used for drug treatments were matched with  
318 concentrations used in previous studies: 0.37 mM prednisone [37], 1 mM melatonin [37],

319 2.5 mM serotonin creatinine sulfate [41]. A control solvent was added to the surface of agar  
320 plates used for culturing animals that did not receive a drug treatment.

321 Synchronized *C. elegans* populations were prepared by picking ~20-30 adult animals to each  
322 seeded plate and allowing them to lay eggs for ~3-4 hours. At the end of this time period, adult  
323 animals were picked and discarded, leaving synchronized eggs on the plate. Eggs were allowed  
324 to hatch and grow at 20°C until the first or second day of adulthood, when all assays were  
325 conducted. Animals for all assays were Day 2 adults, except for animals used for gene  
326 expression and burrowing experiments, which were Day 1 adults. For assays done on Day 2 of  
327 adulthood, animals were transferred on Day 1 to fresh plates in order to ensure sufficient food  
328 and minimal crowding.

### 329 **NemaFlex strength assay**

330 The NemaFlex strength assay was conducted as previously described, with a few modifications  
331 [34, 37]. In our previous study, we used a microfluidic device design that was optimized to  
332 accommodate animals of a much wider age range [37]. For the present study, we instead utilized  
333 a device with modified pillar diameter and spacing that is best used for Day 1 and Day 2 adults.  
334 Here, the pillars had a smaller diameter (~41µm) and tighter spacing (74 µm between edges of  
335 the pillars) due to the smaller size of the worms at the beginning of adulthood. Because of this,  
336 the force constants calculated from this device are not as large as those calculated using the  
337 device in our previous study [37]; this therefore results in smaller force values. However, the  
338 same device is used for all experiments within this study, which allows for consistency in the  
339 comparisons of the data presented here.



340 Synchronized animals were loaded into the devices with one animal per chamber. A 60-second  
341 video was collected for each animal using a Nikon TI-E microscope with a 4x objective and  
342 Andor Zyla sCMOS 5.5 camera at a frame rate of 5 FPS. Movies were then processed and  
343 analyzed for force values using our in-house-built image processing software (MATLAB,  
344 R2015b). Animal strength is determined by selecting for the maximum force exerted in each  
345 frame (300 total frames and therefore force values per animal), and then selecting for the 95<sup>th</sup>  
346 percentile of these forces. The 95<sup>th</sup> percentile is selected rather than the absolute maximum, as it  
347 is more robust to error. Two new measures presented here are endurance and crawling activity.  
348 Endurance is calculated in a similar way to strength, but instead the 50<sup>th</sup> percentile of the  
349 maximum forces exerted is normalized by the strength, or the 95<sup>th</sup> percentile. Thus, this is the  
350 average force exerted normalized by our definition of strength and gives an idea of the profile of  
351 forces being exerted by the animal. Crawling activity is defined as the number of pillars that the  
352 animal interacts with per second, where pillars are automatically counted by image processing  
353 software, and the count of the pillars only needs to be normalized to the duration of the acquired  
354 movie. Significances between wild type and *dys-1* controls were assessed using a 2-sample *t*-test.  
355 Significance between *dys-1* and *dys-1*+treatments was assessed with one-way ANOVA with  
356 Dunnett's post-hoc test.

### 357 **CeleST swim assay**

358 *C. elegans* Swim Test (CeleST) assays were conducted as previously described [35, 36]. Animals  
359 were picked and placed into a 50  $\mu$ L aliquot of M9 Buffer on a specialized glass slide with two,  
360 10-mm pre-printed rings on the surface (Thermo Fisher Scientific), as previously used by the  
361 original developers of the CeleST assay. The rings hold in the M9 buffer and act as a swim arena

362 for the animals. Four to five animals were placed into each M9 buffer aliquot, and two swim  
363 arenas were loaded at a time and then imaged sequentially. Images were acquired with a Nikon  
364 TI-E microscope and Andor Zyla sCMOS 5.5 camera at a frame rate of ~12 FPS. Images were  
365 acquired using dark-field imaging to allow a bright worm on a dark background. Images were  
366 processed using the previously developed CeleST software, although the most recent version of  
367 the software includes 8 of the originally reported 10 measures; the measures of reverse  
368 swimming and attenuation have been dropped from recent releases of the CeleST software and  
369 were thus not considered for the experiments described here. The CeleST software reports the  
370 percentage of frames where a worm was successfully and accurately segmented, and only these  
371 valid frames are used towards the calculation of all measures. An approximate validity cutoff of  
372 80% was implemented to ensure that sufficient and continuous frames were available for  
373 measure computation. Significances between wild type and *dys-1* controls were assessed using a  
374 2-sample *t*-test. Significance between *dys-1* and *dys-1*+treatments was assessed with one-way  
375 ANOVA with Dunnett's post-hoc test.

### 376 **Pluronic gel-based burrowing assay**

377 Burrowing assays were conducted as previously described [25]. Briefly, approximately 30 to  
378 40 *C. elegans* were introduced into the base of a well of a 12-well plate by handpicking with a  
379 platinum wire into a small pluronic drop. Transfer of *E. coli* to the well plate was avoided by first  
380 transferring animals to an unseeded NGM plate and letting them crawl for a few minutes before  
381 the animals were added to the well plate. A volume of 2.5 mL of pluronic was added to form the  
382 upper layer of the gel, which gave a gel height of about 0.75 cm. The exact number of animals  
383 loaded into the well was then counted and recorded. Once the gel had solidified, 20  $\mu$ L of

384 concentrated *E. coli* solution was added to the surface above the animals. The concentrated  
385 *E. coli* solution was made by re-suspending an *E. coli* pellet in liquid NGM, which is just NGM  
386 without the agar. The addition of the *E. coli* solution marked the  $t = 0$  time point of the assay.  
387 The number of animals on the surface was then scored every 15 minutes for a total of 2 hours  
388 unless otherwise noted. The percent of the population reaching the surface at each time point was  
389 then calculated. For all experiments conducted, a concentration of 26 w/w% of Pluronic F-127  
390 (Sigma-Aldrich) in DI water was used. Each condition/strain was run in triplicate, and  
391 significances were assessed using 2-way ANOVA in GraphPad Prism software.

### 392 **Individual-level, multi-environment phenotyping**

393 NemaFlex, CeleST, and burrowing assays were conducted as previously described but with a  
394 few modifications that enabled sustained tracking of the individual animal identity, which  
395 allowed looking at each individual animal under burrowing, crawling, and swimming  
396 environments. Animals were loaded into the 12-well plates as described, and the addition of  
397 bacteria marked the start of the assay. Rather than counting the number of animals on the  
398 surface, however, individual animals were collected from the burrowing wells as they reached  
399 the surface. Each animal was given a score of how many minutes it took to reach the surface.  
400 Individual animals were placed in a 35mm NGM plate with *E. coli* OP50 and allowed to recover  
401 for 4 hours. Individual animals were then imaged swimming for CeleST analysis (swimming  
402 only for a few minutes), and then were placed back on their agar plate. After all imaging was  
403 finished for swimming animals, individual worms were loaded into NemaFlex chambers and  
404 imaged and analyzed for strength, activity, and muscular endurance as previously described. The  
405 only difference in data representation is for that of burrowing ability, where individual animals

406 were given the score of number of minutes taken to reach the surface. This is in contrast to the  
407 typical representation of the percent of the population that has reached the surface at a given time  
408 point that is reported when populations rather than individuals are assessed.

#### 409 **Gene expression via quantitative PCR**

410 To assess how *C. elegans* respond to the three different environments of crawling, burrowing,  
411 and swimming, we conducted an assay where wild-type *C. elegans* were allowed to burrow for  
412 90 minutes, and then we assessed the genetic response as related to oxidative stress, glucose  
413 metabolism, and fat metabolism. Animals were loaded into burrowing wells as previously  
414 described, except a tall gel layer that filled the well completely to the top was added to ensure  
415 that animals did not exit the burrowing environment during the 90 minutes of burrowing. Liquid  
416 NGM was added to the surface to provide chemotactic stimulation to the animals without  
417 introducing a food source (*E. coli*). A control group of animals were transferred to unseeded  
418 NGM plates for the 90-minute duration of the burrowing. At the conclusion of the 90 minutes,  
419 approximately 30 each of burrowing and control animals were collected in M9 Buffer. Another  
420 set of burrowing and control animals were transferred to seeded NGM plates for recovery, and  
421 then were collected after 2 hours.

422 The RNA extraction and qPCR protocols were consistent with those previously described [38,  
423 51]. Immediately after collection in M9 Buffer, animals were spun down and the supernatant was  
424 removed. After the addition of TRIzol (Ambion), animals underwent snap freezing with liquid  
425 nitrogen. The samples then underwent freeze/thaw cycles with liquid nitrogen and a heat block at  
426 37°C. Subsequently, total RNA was extracted as instructed by the manufacturer's protocol

427 (Ambion), and cDNA was made with the SuperScript III First-Strand Synthesis System  
428 (Invitrogen). The PerfeCTa SYBR Green FastMix (Quantabio), 0.5  $\mu$ M of primers for each gene,  
429 and diluted cDNA were used for conducting qPCR. The primers used match those previously  
430 published as part of the prior analysis done for gene expression changes after 90 minutes of  
431 swimming [38]. A 7500 Fast Real-Time PCR System (Applied Biosystems) was used with the  
432  $\Delta\Delta$ Ct method relative expression method for calculations [52]. For reference genes, *cdc-42* and  
433 Y45F10D.4 were used [53].

434 **Statistical analyses.** All significances were assessed with a 2-sample t-test, except for  
435 population burrowing comparisons, which were assessed using two-way ANOVA in GraphPad  
436 Prism software, and NemaFlex and CeleST measures for *dys-1* vs. *dys-1*+treatments, which were  
437 assessed with one-way ANOVA with Dunnett's post-hoc test.

## 438 ACKNOWLEDGEMENTS

439 Some strains were provided by the CGC, which is funded by NIH Office of Research  
440 Infrastructure Programs (P40 OD010440). We would like to acknowledge Leila Lesanpezeshki  
441 for useful discussions surrounding burrowing experiments and for fabricating the mold used to  
442 make NemaFlex microfluidic devices. This work is partially supported by funding from the  
443 National Institutes of Health (RO1 AG051995-04 to M.D. & S.V.), National Aeronautics and  
444 Space Administration (NNX15AL16G to S.V.), and the Biotechnology and Biological Sciences  
445 Research Council (BB/N015894/1 to N.J.S.). J.E.H. acknowledges funding support from the  
446 Fulbright U.S. Student Program and the Germanistic Society of America. R.L. has been funded  
447 by postdoctoral fellowships from Life Sciences Research Foundation (sponsored by Simons

448 Foundation; award # Laranjeiro-2015) and American Heart Association (award  
449 # 18POST33960502). A.A. was supported by the Max Planck Society.

450

## REFERENCES

- 451 1. Caspersen CJ, Powell KE, Christenson GM. Physical activity, exercise, and physical  
452 fitness: definitions and distinctions for health-related research. Public health rep.  
453 1985;100(2):126-31.
- 454 2. McDonald CM. Physical activity, health impairments, and disability in neuromuscular  
455 disease. American journal of physical medicine & rehabilitation. 2002;81(11):S108-S20.
- 456 3. Beudart C, Rolland Y, Cruz-Jentoft AJ, Bauer JM, Sieber C, Cooper C, et al.  
457 Assessment of muscle function and physical performance in daily clinical practice. Calcified  
458 Tissue International. 2019:1-14.
- 459 4. Wang L, Larson EB, Bowen JD, van Belle G. Performance-based physical function and  
460 future dementia in older people. Archives of internal medicine. 2006;166(10):1115-20.
- 461 5. Guralnik JM, Simonsick EM, Ferrucci L, Glynn RJ, Berkman LF, Blazer DG, et al. A  
462 short physical performance battery assessing lower extremity function: association with self-  
463 reported disability and prediction of mortality and nursing home admission. Journal of  
464 gerontology. 1994;49(2):M85-M94.
- 465 6. Studenski S, Perera S, Wallace D, Chandler JM, Duncan PW, Rooney E, et al. Physical  
466 performance measures in the clinical setting. Journal of the American Geriatrics Society.  
467 2003;51(3):314-22.
- 468 7. Volpato S, Cavalieri M, Sioulis F, Guerra G, Maraldi C, Zuliani G, et al. Predictive value  
469 of the Short Physical Performance Battery following hospitalization in older patients. The  
470 Journals of Gerontology Series A: Biological Sciences and Medical Sciences. 2011;66(1):89-96.
- 471 8. Rockwood K, Song X, MacKnight C, Bergman H, Hogan DB, McDowell I, et al. A  
472 global clinical measure of fitness and frailty in elderly people. Canadian Medical Association  
473 Journal. 2005;173(5):489-95.
- 474 9. Brenner S. The genetics of *Caenorhabditis elegans*. Genetics. 1974;77(1):71-94.
- 475 10. Collins CA, Morgan JE. Duchenne's muscular dystrophy: animal models used to  
476 investigate pathogenesis and develop therapeutic strategies. International Journal of  
477 Experimental Pathology. 2003;84(4):165-72.
- 478 11. Nass R, Miller DM, Blakely RD. *C. elegans*: a novel pharmacogenetic model to study  
479 Parkinson's disease. Parkinsonism & Related Disorders. 2001;7(3):185-91.
- 480 12. Harrington AJ, Hamamichi S, Caldwell GA, Caldwell KA. *C. elegans* as a model  
481 organism to investigate molecular pathways involved with Parkinson's disease. Developmental  
482 Dynamics. 2010;239(5):1282-95.

- 483 13. Link CD. *C. elegans* models of age-associated neurodegenerative diseases: lessons from  
484 transgenic worm models of Alzheimer's disease. *Experimental Gerontology*. 2006;41(10):1007-  
485 13.
- 486 14. Parker JA, Connolly JB, Wellington C, Hayden M, Dausset J, Neri C. Expanded  
487 polyglutamines in *Caenorhabditis elegans* cause axonal abnormalities and severe dysfunction of  
488 PLM mechanosensory neurons without cell death. *Proceedings of the National Academy of*  
489 *Sciences*. 2001;98(23):13318-23.
- 490 15. Poulin G, Nandakumar R, Ahringer J. Genome-wide RNAi screens in *Caenorhabditis*  
491 *elegans*: impact on cancer research. *Oncogene*. 2004;23(51):8340-5.
- 492 16. Herndon LA, Schmeissner PJ, Dudaronek JM, Brown PA, Listner KM, Sakano Y, et al.  
493 Stochastic and genetic factors influence tissue-specific decline in ageing *C. elegans*. *Nature*.  
494 2002;419(6909):808-14.
- 495 17. Bushby K, Finkel R, Birnkrant DJ, Case LE, Clemens PR, Cripe L, et al. Diagnosis and  
496 management of Duchenne muscular dystrophy, part 1: diagnosis, and pharmacological and  
497 psychosocial management. *The Lancet Neurology*. 2010;9(1):77-93.
- 498 18. Folch J, Petrov D, Etcheto M, Abad S, Sánchez-López E, García ML, et al. Current  
499 research therapeutic strategies for Alzheimer's disease treatment. *Neural Plasticity*. 2016;2016.
- 500 19. Dehay B, Bourdenx M, Gorry P, Przedborski S, Vila M, Hunot S, et al. Targeting  $\alpha$ -  
501 synuclein for treatment of Parkinson's disease: mechanistic and therapeutic considerations. *The*  
502 *Lancet Neurology*. 2015;14(8):855-66.
- 503 20. Ross CA, Tabrizi SJ. Huntington's disease: from molecular pathogenesis to clinical  
504 treatment. *The Lancet Neurology*. 2011;10(1):83-98.
- 505 21. Kwak JY, Kwon K-S. Pharmacological Interventions for Treatment of Sarcopenia:  
506 Current Status of Drug Development for Sarcopenia. *Journal of the Korean Geriatrics Society*.  
507 2019.
- 508 22. Nussbaum-Krammer CI, Neto MF, Brielmann RM, Pedersen JS, Morimoto RI.  
509 Investigating the spreading and toxicity of prion-like proteins using the metazoan model  
510 organism *C. elegans*. *JoVE (Journal of Visualized Experiments)*. 2015;(95):e52321.
- 511 23. Buckingham SD, Sattelle DB. Fast, automated measurement of nematode swimming  
512 (thrashing) without morphometry. *Bmc Neuroscience*. 2009;10(1):1.
- 513 24. Bainbridge C, Schuler A, Vidal-Gadea AG. Method for the assessment of neuromuscular  
514 integrity and burrowing choice in vermiform animals. *Journal of Neuroscience Methods*.  
515 2016;264:40-6.



- 516 25. Lesanpezeshki L, Hewitt JE, Laranjeiro R, Antebi A, Driscoll M, Szewczyk NJ, et al.  
517 Pluronic gel-based burrowing assay for rapid assessment of neuromuscular health in *C. elegans*.  
518 Scientific Reports. 2019;(1):15246. doi: 10.1038/s41598-019-51608-9.
- 519 26. Krajacic P, Shen X, Purohit PK, Arratia P, Lamitina T. Biomechanical profiling of  
520 *Caenorhabditis elegans* motility. Genetics. 2012;191(3):1015-21.
- 521 27. Yemini E, Jucikas T, Grundy LJ, Brown AEX, Schafer WR. A database of  
522 *Caenorhabditis elegans* behavioral phenotypes. Nature Methods. 2013;10(9):877-9.
- 523 28. Fang-Yen C, Wyart M, Xie J, Kawai R, Kodger T, Chen S, et al. Biomechanical analysis  
524 of gait adaptation in the nematode *Caenorhabditis elegans*. Proceedings of the National Academy  
525 of Sciences. 2010;107(47):20323-8.
- 526 29. Shen XN, Sznitman J, Krajacic P, Lamitina T, Arratia PE. Undulatory locomotion of  
527 *Caenorhabditis elegans* on wet surfaces. Biophysical journal. 2012;102(12):2772-81.
- 528 30. Bilbao A, Patel AK, Rahman M, Vanapalli SA, Blawdziewicz J. Roll maneuvers are  
529 essential for active reorientation of *Caenorhabditis elegans* in 3D media. Proceedings of the  
530 National Academy of Sciences. 2018:201706754.
- 531 31. Beron C, Vidal-Gadea AG, Cohn J, Parikh A, Hwang G, Pierce-Shimomura JT. The  
532 burrowing behavior of the nematode *Caenorhabditis elegans*: a new assay for the study of  
533 neuromuscular disorders. Genes, Brain and Behavior. 2015;14(4):357-68.
- 534 32. Johari S, Nock V, Alkaisi MM, Wang W. On-chip analysis of *C. elegans* muscular forces  
535 and locomotion patterns in microstructured environments. Lab on a Chip. 2013;13(9):1699-707.
- 536 33. Khare SM, Awasthi A, Venkataraman V, Koushika SP. Colored polydimethylsiloxane  
537 micropillar arrays for high throughput measurements of forces applied by genetic model  
538 organisms. Biomicrofluidics. 2015;9(1):014111.
- 539 34. Rahman M, Hewitt J, Van-Bussel F, Edwards H, Blawdziewicz J, Szewczyk N, et al.  
540 NemaFlex: A microfluidics-based technology for standardized measurement of muscular  
541 strength of *C. elegans*. Lab on a Chip. 2018;18(15):2187-201. doi: 10.1039/C8LC00103K.
- 542 35. Restif C, Ibáñez-Ventoso C, Vora MM, Guo S, Metaxas D, Driscoll M. CeleST:  
543 computer vision software for quantitative analysis of *C. elegans* swim behavior reveals novel  
544 features of locomotion. PLOS Computational Biology. 2014.
- 545 36. Ibáñez-Ventoso C, Herrera C, Chen E, Motto D, Driscoll M. Automated Analysis of *C.*  
546 *elegans* Swim Behavior Using CeleST Software. JoVE (Journal of Visualized Experiments).  
547 2016;(118):e54359-e.
- 548 37. Hewitt JE, Pollard AK, Lesanpezeshki L, Deane CS, Gaffney CJ, Etheridge T, et al.  
549 Muscle strength deficiency and mitochondrial dysfunction in a muscular dystrophy model of

- 550 *Caenorhabditis elegans* and its functional response to drugs. *Disease Models & Mechanisms*.  
551 2018;11(12):dmm036137.
- 552 38. Laranjeiro R, Harinath G, Burke D, Braeckman BP, Driscoll M. Single swim sessions in  
553 *C. elegans* induce key features of mammalian exercise. *BMC Biology*. 2017;15(1):30. doi:  
554 10.1186/s12915-017-0368-4.
- 555 39. DeSilva S, Drachman DB, Mellits D, Kuncl RW. Prednisone treatment in Duchenne  
556 muscular dystrophy: long-term benefit. *Archives of Neurology*. 1987;44(8):818-22.
- 557 40. Chahbouni M, Escames G, Venegas C, Sevilla B, García JA, Lopez LC, et al. Melatonin  
558 treatment normalizes plasma pro-inflammatory cytokines and nitrosative/oxidative stress in  
559 patients suffering from Duchenne muscular dystrophy. *Journal of Pineal Research*.  
560 2010;48(3):282-9.
- 561 41. Carre-Pierrat M, Mariol M-C, Chambonnier L, Laugraud A, Heskia F, Giacomotto J, et  
562 al. Blocking of striated muscle degeneration by serotonin in *C. elegans*. *Journal of Muscle*  
563 *Research & Cell Motility*. 2006;27(3-4):253-8.
- 564 42. Gurel V, Lins J, Lambert K, Lazauski J, Spaulding J, McMichael J. Serotonin and  
565 Histamine Therapy Increases Tetanic Forces of Myoblasts, Reduces Muscle Injury, and  
566 Improves Grip Strength Performance of Dmdmdx Mice. Dose-Response.  
567 2015;13(4):1559325815616351.
- 568 43. Hughes KJ, Rodriguez A, Flatt KM, Ray S, Schuler A, Rodemoyer B, et al. Physical  
569 exertion exacerbates decline in the musculature of an animal model of Duchenne muscular  
570 dystrophy. *Proceedings of the National Academy of Sciences*. 2019;116(9):3508-17.
- 571 44. Ghosh R, Mohammadi A, Kruglyak L, Ryu WS. Multiparameter behavioral profiling  
572 reveals distinct thermal response regimes in *Caenorhabditis elegans*. *BMC Biology*.  
573 2012;10(1):85.
- 574 45. Feng Z, Cronin CJ, Wittig JH, Sternberg PW, Schafer WR. An imaging system for  
575 standardized quantitative analysis of *C. elegans* behavior. *BMC Bioinformatics*. 2004;5(1):115.
- 576 46. Nahabedian JF, Qadota H, Stirman JN, Lu H, Benian GM. Bending amplitude—A new  
577 quantitative assay of *C. elegans* locomotion: Identification of phenotypes for mutants in genes  
578 encoding muscle focal adhesion components. *Methods*. 2012;56(1):95-102.
- 579 47. Oh KH, Kim H. Reduced IGF signaling prevents muscle cell death in a *Caenorhabditis*  
580 *elegans* model of muscular dystrophy. *Proceedings of the National Academy of Sciences*.  
581 2013;110(47):19024-9.
- 582 48. Yuan J, Ko H, Raizen DM, Bau HH. Terrain following and applications: *Caenorhabditis*  
583 *elegans* swims along the floor using a bump and undulate strategy. *Journal of The Royal Society*  
584 *Interface*. 2016;13(124):20160612.

- 585 49. Sznitman J, Purohit PK, Krajacic P, Lamitina T, Arratia PE. Material properties of  
586 *Caenorhabditis elegans* swimming at low Reynolds number. *Biophysical Journal*.  
587 2010;98(4):617-26.
- 588 50. Gaud A, Simon J-M, Witzel T, Carre-Pierrat M, Wermuth CG, Ségalat L. Prednisone  
589 reduces muscle degeneration in dystrophin-deficient *Caenorhabditis elegans*. *Neuromuscular*  
590 *Disorders*. 2004;14(6):365-70.
- 591 51. Laranjeiro R, Harinath G, Hewitt JE, Hartman JH, Royal MA, Meyer JN, et al. Swim  
592 exercise in *Caenorhabditis elegans* extends neuromuscular and gut healthspan, enhances learning  
593 ability, and protects against neurodegeneration. *Proceedings of the National Academy of*  
594 *Sciences*. 2019;116(47):23829-39.
- 595 52. Livak KJ, Schmittgen TD. Analysis of relative gene expression data using real-time  
596 quantitative PCR and the  $2^{-\Delta\Delta CT}$  method. *Methods*. 2001;25(4):402-8.
- 597 53. Hoogewijs D, Houthoofd K, Matthijssens F, Vandesompele J, Vanfleteren JR. Selection  
598 and validation of a set of reliable reference genes for quantitative sod gene expression analysis in  
599 *C. elegans*. *BMC Molecular Biology*. 2008;9(1):9.

600
